# Supplementary material
Source: PubMed Central journal article supplement (PMC11548939)
Supplement: NIHMS2032954-supplement-Data_Supplement.pdf [file NIHMS2032954-supplement-Data_Supplement.pdf]

## Appendix: Additional tables

Table A1: Possible values of the pre-specified design parameters.

| Parameters                  | Target toxicity rate for the MTD |      |      |      |      |      |      |
|-----------------------------|----------------------------------|------|------|------|------|------|------|
|                             | 0.1                              | 0.15 | 0.2  | 0.25 | 0.3  | 0.35 | 0.4  |
| $\lambda_e$ (escalation)    | 0.08                             | 0.12 | 0.16 | 0.2  | 0.24 | 0.28 | 0.32 |
| $\lambda_d$ (de-escalation) | 0.12                             | 0.18 | 0.24 | 0.3  | 0.36 | 0.42 | 0.48 |
| $\lambda_r$ (remove)        | 0.23                             | 0.38 | 0.45 | 0.56 | 0.67 | 0.79 | 0.90 |

Table A2: Number of DLTs that suggest dose escalation, de-escalation, and removal for  $\lambda_e = 0.16$ ,  $\lambda_d = 0.24$ ,  $\lambda_e = 0.24$  and  $\lambda_r = 0.45$ .

| Suggested action                         | The number of patients treated at a DL |   |   |   |   |   |   |   |   |    |    |    |    |    |    |
|------------------------------------------|----------------------------------------|---|---|---|---|---|---|---|---|----|----|----|----|----|----|
|                                          | 1                                      | 2 | 3 | 4 | 5 | 6 | 7 | 8 | 9 | 10 | 11 | 12 | 13 | 14 | 15 |
| Escalation allowed if no. of DLTs $\leq$ | 0                                      | 0 | 0 | 0 | 0 | 0 | 1 | 1 | 1 | 1  | 1  | 1  | 2  | 2  | 2  |
| De-escalate if no. of DLTs $\geq$        | 1                                      | 1 | 1 | 1 | 2 | 2 | 2 | 2 | 3 | 3  | 3  | 3  | 4  | 4  | 4  |
| Remove if no. of DLTs $\geq$             | 1                                      | 1 | 2 | 2 | 3 | 3 | 4 | 4 | 5 | 5  | 5  | 6  | 6  | 7  | 7  |
